# Supplementary material
Source: PubMed Central journal article supplement (PMC3670736)
Supplement: supp_mst018_Supplementary_tables.pdf [file supp_mst018_Supplementary_tables.pdf]

## Supplementary Tables

Table S1. List of volvoclean strains and *MAT3* sequences used in this study.

| Taxon<br>(sexual reproduction)             | Strain designation                   | Gender<br>(mating type) | Accession number<br>of <i>MAT3</i> | Characteristics of full length<br>open reading frames of <i>MAT3</i> |                            |                                  |
|--------------------------------------------|--------------------------------------|-------------------------|------------------------------------|----------------------------------------------------------------------|----------------------------|----------------------------------|
|                                            |                                      |                         |                                    | Number of<br>nucleotides                                             | Number of<br>deduced amino | <i>MAT3</i> locus<br>[reference] |
| <i>Gonium pectorale</i><br>(isogamy)       | K41 <sup>a</sup>                     | <i>plus</i>             | AB771928                           | 3,084                                                                | 1,028                      | within <i>MT</i>                 |
|                                            | NIES-1711<br>(Kaneko4)               | <i>plus</i>             | AB771929                           |                                                                      |                            | [Hamaji T et al.<br>unpublished] |
|                                            | K34 <sup>a</sup>                     | <i>minus</i>            | AB771930                           | 3,084                                                                | 1,028                      |                                  |
|                                            | NIES-1710<br>(Kaneko3)               | <i>minus</i>            | AB771931                           |                                                                      |                            |                                  |
| <i>Yamagishiella unicocca</i><br>(isogamy) | NIES-1861 (Hasu-4)                   | <i>plus</i>             | AB771932                           | 3,726                                                                | 1,242                      | ND                               |
|                                            | NIES-1859 (Hasu-1)                   | <i>minus</i>            | AB771933                           | 3,726                                                                | 1,242                      |                                  |
| <i>Eudorina</i> sp.<br>(anisogamy)         | 2010-623-F1-E2 <sup>b</sup>          | male                    | AB771934                           | 3,522                                                                | 1,174                      | within or near <i>MT</i>         |
|                                            |                                      |                         | AB771935                           |                                                                      |                            | [the present study]              |
|                                            | 2010-623-F1-E8 <sup>b</sup>          | female                  | AB771936<br>AB771937               | 3,522                                                                | 1,174                      |                                  |
| <i>Pleodorina starii</i><br>(anisogamy)    | 2010-0513-F2-P10 <sup>c</sup>        | female                  | AB771938                           | 3,102                                                                | 1,034                      | ND                               |
|                                            | 2010-0513-F2-P11 <sup>c</sup>        | male                    | AB771939                           | 3,102                                                                | 1,034                      |                                  |
| <i>Volvox africanus</i><br>(oogamy)        | UTEX 1890<br>(Darra 6 <sup>d</sup> ) | male                    | AB771940                           | 3,375                                                                | 1,125                      | ND                               |
|                                            | UTEX 1891<br>(Darra 4 <sup>d</sup> ) | female                  | AB771941                           | 3,375                                                                | 1,125                      |                                  |
| <i>Volvox obversus</i><br>(oogamy)         | UTEX 1865                            | male                    | AB771942                           |                                                                      |                            |                                  |

|                          |                             |              |              |       |       |                         |
|--------------------------|-----------------------------|--------------|--------------|-------|-------|-------------------------|
| <i>Volvox carteri</i> f. | Adam <sup>e</sup>           | male         | GU784916     | 3,339 | 1,113 | within <i>MT</i> [S1]   |
| <i>nagariensis</i>       | Eve <sup>e</sup>            | female       | XM_002954427 | 3,321 | 1,107 |                         |
| (oogamy)                 |                             |              |              |       |       |                         |
| <i>Volvox carteri</i> f. | NIES-722                    | male         | AB771943     |       |       |                         |
| <i>kawasakiensis</i>     | NIES-733                    | female       | AB771944     |       |       |                         |
| (oogamy)                 |                             |              |              |       |       |                         |
| <i>Volvox carteri</i> f. | NIES-866                    | male         | AB771945     |       |       |                         |
| <i>weismannia</i>        | (=UTEX 1875, Wt 4           |              |              |       |       |                         |
| (oogamy)                 | male <sup>f</sup> )         |              |              |       |       |                         |
|                          | UTEX 1876                   | female       | AB771946     |       |       |                         |
|                          | (Wt 3 female <sup>f</sup> ) |              |              |       |       |                         |
| <i>Chlamydomonas</i>     | 8511A <sup>g</sup>          | <i>plus</i>  | AB771947     | 3,627 | 1,209 | autosome near <i>MT</i> |
| <i>reinhardtii</i>       | 8511B <sup>g</sup>          | <i>minus</i> | AB771948     | 3,627 | 1,209 | [S2]                    |
| (isogamy)                |                             |              |              |       |       |                         |
| <i>Chlamydomonas</i>     | CC-1870 <sup>h</sup>        |              | AY781411     | 3,639 | 1,213 |                         |
| <i>globosa</i>           |                             |              |              |       |       |                         |
| (isogamy)                |                             |              |              |       |       |                         |

<sup>a</sup>F1 strains of Kaneko3x4 [S3].

<sup>b</sup>F1 strains of male and female strains (2006-703-E14xE15; [S4]).

<sup>c</sup>F2 strains of male and female strains [S5].

<sup>d</sup>Isolated from the same mud sample [S6].

<sup>e</sup>Not examined in this study.

<sup>f</sup>Originating from Waterford, Australia [S7]

<sup>g</sup>Saito et al. [S8].

<sup>h</sup>Previously misidentified as *C. incerta* [S9].

Table S2. Gender-based divergence of *MAT3* genes from *Chlamydomonas reinhardtii* and six species of the colonial Volvocales.

| Taxon                                       | S      | N      | dN     | SE     | dS     | SE     | dN/dS  |
|---------------------------------------------|--------|--------|--------|--------|--------|--------|--------|
| <i>Chlamydomonas reinhardtii</i>            | 662.1  | 2964.9 | 0.0020 | 0.0008 | 0.0262 | 0.0064 | 0.0773 |
| <i>Gonium pectorale</i>                     | 837    | 2247   | 0.0004 | 0.0004 | 0.0012 | 0.0012 | 0.3723 |
| <i>Yamagishiella unicocca</i>               | 1000.5 | 2722.5 | 0      | 0      | 0      | 0      | NA     |
| <i>Eudorina</i> sp.                         | 1043.3 | 2478.7 | 0.0004 | 0.0004 | 0.001  | 0.001  | 0.4208 |
| <i>Pleodorina starrii</i>                   | 885    | 2214   | 0      | 0      | 0      | 0      | NA     |
| <i>Volvox africanus</i>                     | 916.9  | 2455.1 | 0.0086 | 0.0019 | 0.0166 | 0.0043 | 0.519  |
| <i>Volvox carteri</i> f. <i>nagariensis</i> | 859.7  | 2320.3 | 0.3621 | 0.0152 | 1.6465 | 0.1444 | 0.2199 |

S, number of synonymous positions; N, number of nonsynonymous positions; dN, number of substitutions per nonsynonymous site; dS, number of substitutions per synonymous site. For details, see supplementary table S1 and supplementary information (Supplementary Material online).

## Supplementary References

- S1. Ferris P, Olson BJSC, De Hoff PL, et al. (15 co-authors). 2010. Evolution of an expanded sex-determining locus in *Volvox*. *Science* 328: 351–354.
- S2. Umen JG, Goodenough, UW. 2001. Control of cell division by a retinoblastoma protein homolog in *Chlamydomonas*. *Genes Dev.* 15: 1652–1661.
- S3. Mogi Y, Hamaji T, Suzuki M, Ferris P, Mori T, Kabeya Y, Miyagishima S, Nozaki H. 2012. Evidence for tubular mating structures induced in each mating type of heterothallic *Gonium pectorale* (Volvocales, Chlorophyta). *J Phycol.* 48: 670–674.
- S4. Yamada TK, Tsuchikane Y, Wu J-T, Sekimoto H, Miyaji K, Nozaki H. 2008. Morphology and molecular phylogeny of *Eudorina* sp. (Volvocaceae, Chlorophyceae) from Taiwan. *Hikobia* 15: 135–143.
- S5. Nozaki H. 2008. Zygote germination in *Pleodorina starrii* (Volvocaceae, Chlorophyta). *Biologia* 63/6: 774–776.
- S6. Starr RC. 1971. Sexual reproduction in *Volvox africanus*. In Parker BC, Brown RM, editors. *Contributions to phycology*. Lawrence (KS): Allen Press. pp. 59–66.
- S7. Starr RC. 1968. Cellular differentiation in *Volvox*. *Proc Natl Acad Sci USA* 59: 1082–1088.
- S8. Saito T, Inoue M, Yamada M, Matsuda Y. 1998. Control of gametic differentiation and activity by light in *Chlamydomonas reinhardtii*. *Plant Cell Physiol.* 39: 8–15.
- S9. Nakada T, Shinkawa H, Ito T, Tomita M. 2010. Recharacterization of *Chlamydomonas reinhardtii* and its relatives with new isolates from Japan. *J Plant Res.* 123: 67–78.
